# Supplementary material for: A high-throughput assessment of the adsorption capacity and Li-ion diffusion dynamics in Mo-based ordered double-transition-metal MXenes as anode materials for fast-charging LIBs
Source: Royal Society of Chemistry journal article supplement (doi:10.1039/d0nr05828a), 2020-01-01
Supplement: d0nr05828a1.pdf [file d0nr05828a1.pdf]

# **A High-throughput Assessing of Adsorption Capacity and Li-ion Diffusion Dynamics in Mo Based Ordered Double-Transition-Metal MXenes as Anode Materials for Fast Charging LIBs**

Hangyu Wang<sup>a</sup>, Ziang Jing<sup>a</sup>, Haoliang Liu<sup>a</sup>, Xianghui Feng<sup>a</sup>, Guodong Meng<sup>a</sup>,

Kai Wu<sup>a</sup>, Yonghong Cheng<sup>a</sup>, Bing Xiao<sup>\*a</sup>

a. School of Electrical Engineering, State Key Laboratory of Electrical Insulation and Power Equipment, Xi'an Jiaotong University, Xi'an 710049, China

Corresponding Author: [bingxiao84@xjtu.edu.cn](mailto:bingxiao84@xjtu.edu.cn)

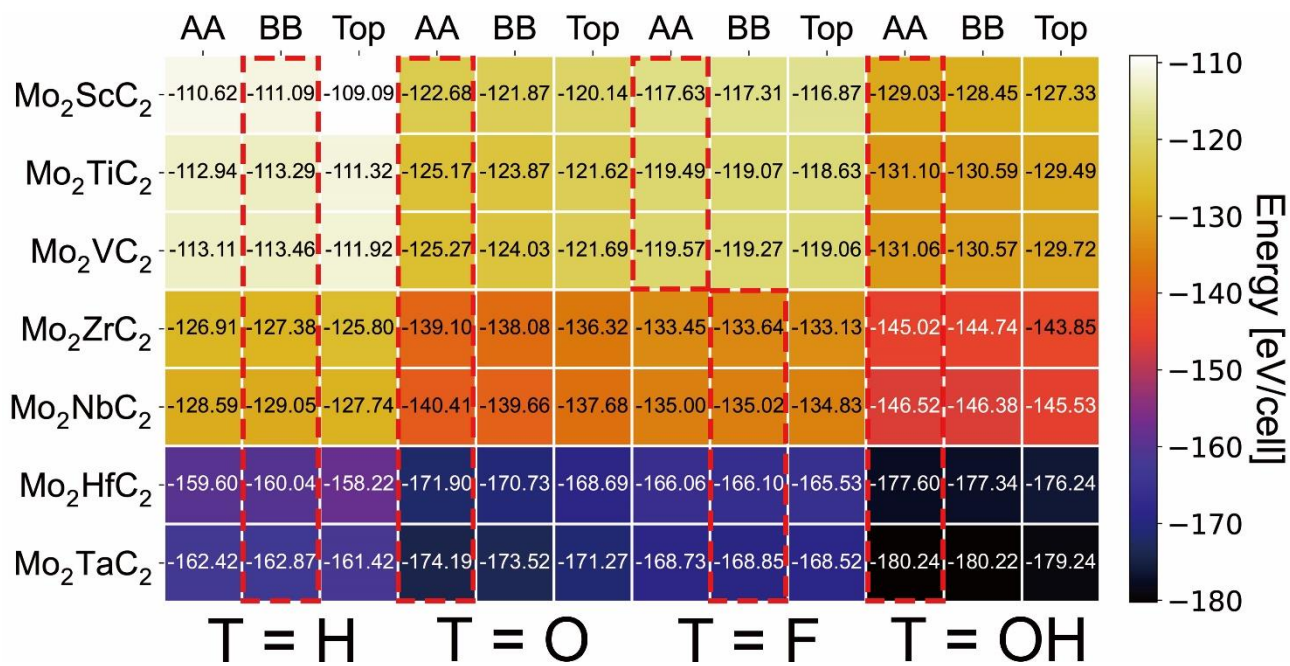

**Figure S1.** The total energies of Mo-based MXenes with surface functional groups T (H, O, F, and OH) at different adsorption sites. The most stable adsorption structures and associated total cell energies are highlighted in rectangular box by the red-dashed lines.

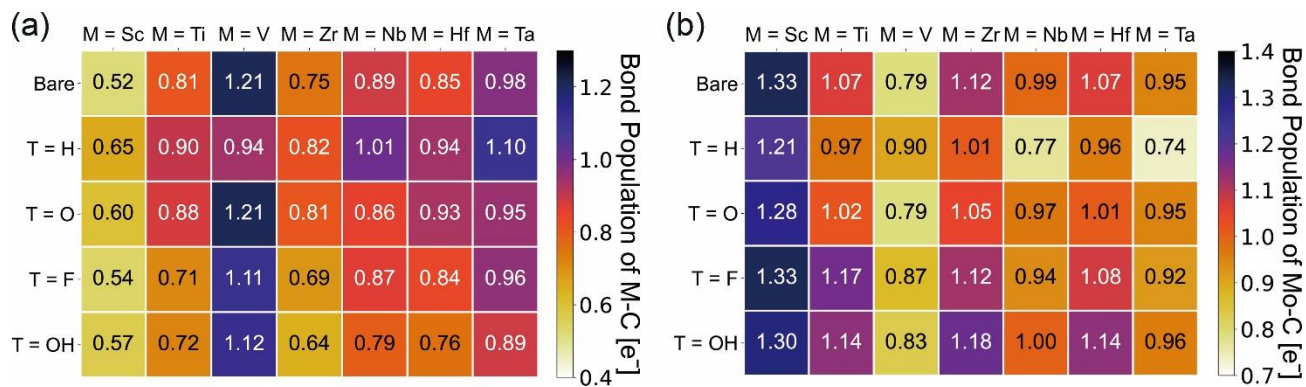

**Figure S2.** The bond population of (a) M-C and (b) Mo-C in  $\text{Mo}_2\text{MC}_2$  and  $\text{Mo}_2\text{MC}_2\text{T}_2$  ( $M = \text{Sc, Ti, V, Zr, Nb, Hf, Ta}$ ,  $T = \text{H, O, F, OH}$ ).

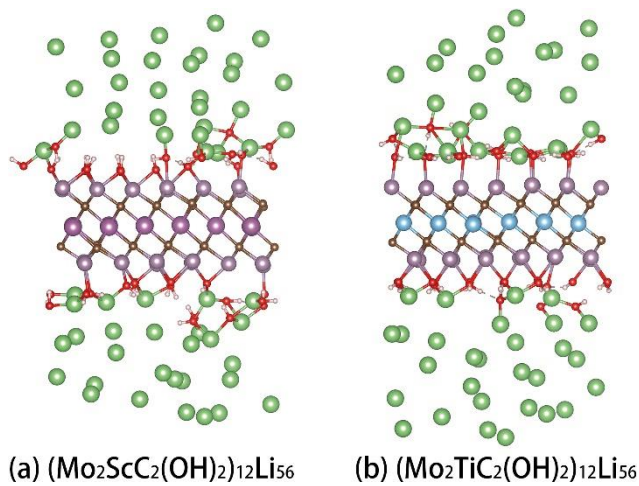

**Figure S3.** The snapshots of -OH functionalized MXenes placed in between two bulk Li metals in FPMD simulations at 200 K: (a)  $\text{Mo}_2\text{ScC}_2$  and (b)  $\text{Mo}_2\text{TiC}_2$ .

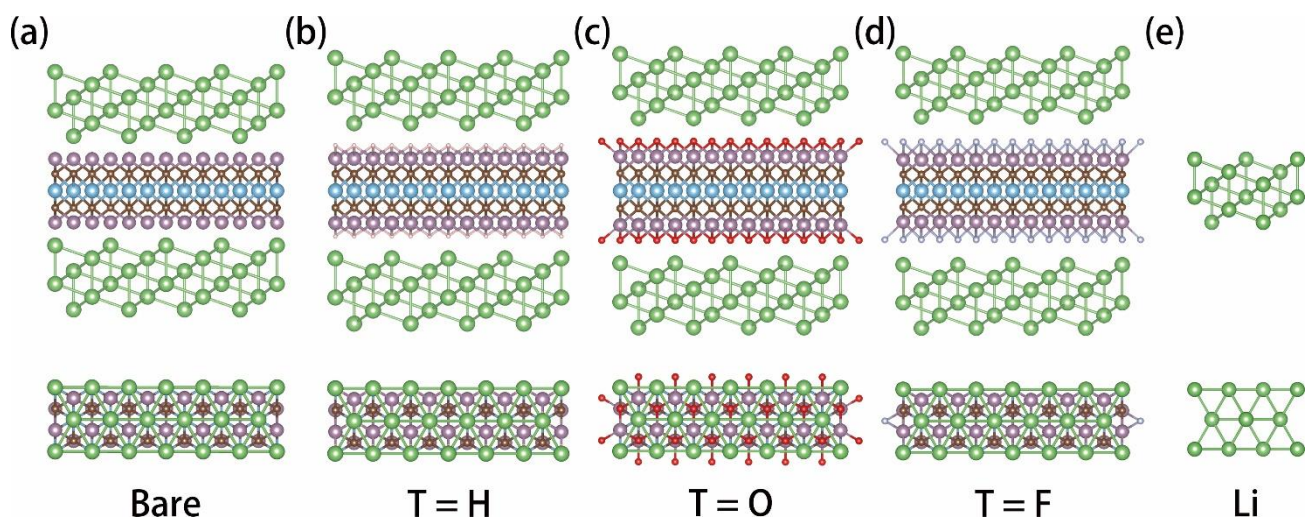

**Figure S4.** The top and side view of initial sandwich structures of (a)  $\text{Mo}_2\text{MC}_2$ , (b)  $\text{Mo}_2\text{MC}_2\text{H}_2$ , (c)  $\text{Mo}_2\text{MC}_2\text{O}_2$ , (d)  $\text{Mo}_2\text{MC}_2\text{F}_2$  and the crystallographic plane (111) of bulk Li metal (BCC).

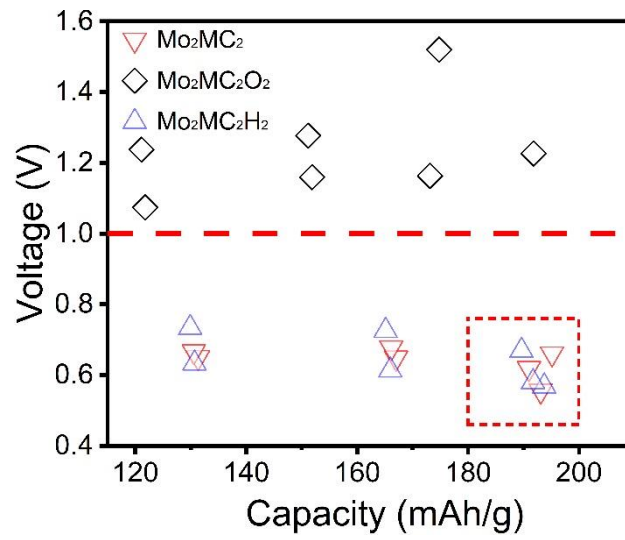

**Figure S5.** Average open circuit voltage and theoretical capacity of Li saturated adsorption structures of Mo<sub>2</sub>MC<sub>2</sub> and Mo<sub>2</sub>MC<sub>2</sub>T<sub>2</sub> (M stands for transition metal, and T = H, and O). The red box area indicates an optimal active voltage window and with storage capacity greater than 180 mAh/g.

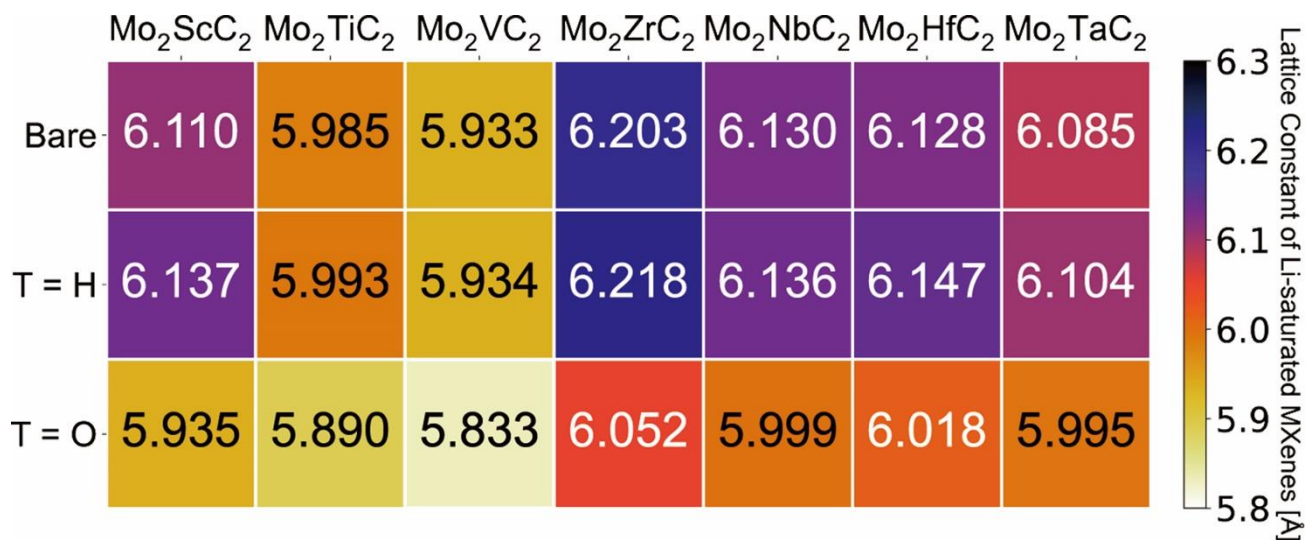

**Figure S6.** Planar lattice constants of 2×2×1 supercell model of Mo<sub>2</sub>MC<sub>2</sub>, Mo<sub>2</sub>MC<sub>2</sub>H<sub>2</sub> and Mo<sub>2</sub>MC<sub>2</sub>O<sub>2</sub> (M = Sc, Ti, V, Zr, Nb, Hf, Ta) with full Li adsorbed.

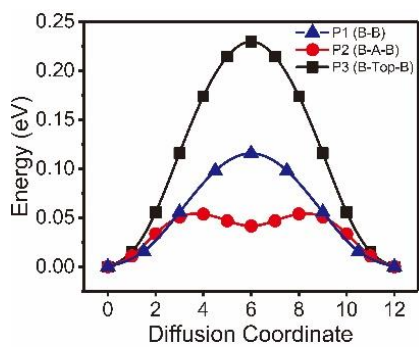

(a)  $\text{Mo}_2\text{ScC}_2$

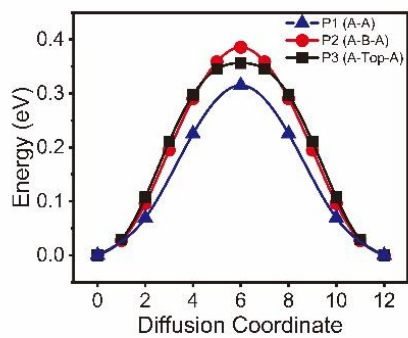

(b)  $\text{Mo}_2\text{ScC}_2\text{H}_2$

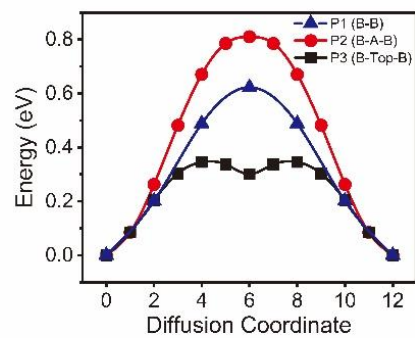

(c)  $\text{Mo}_2\text{ScC}_2\text{O}_2$

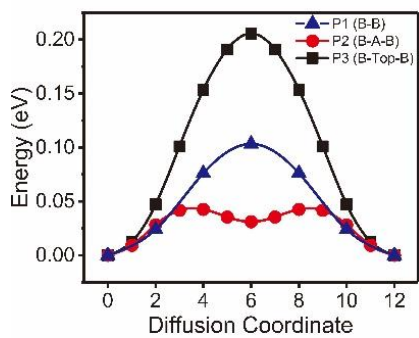

(d)  $\text{Mo}_2\text{TiC}_2$

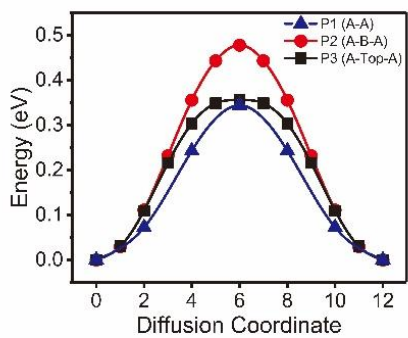

(e)  $\text{Mo}_2\text{TiC}_2\text{H}_2$

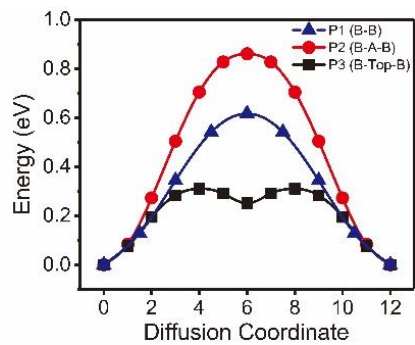

(f)  $\text{Mo}_2\text{TiC}_2\text{O}_2$

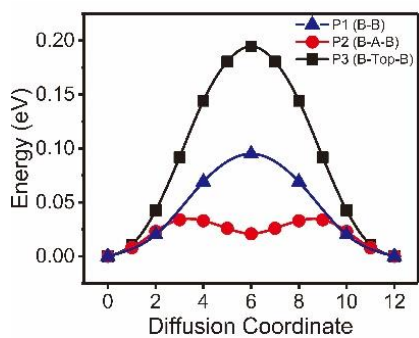

(g)  $\text{Mo}_2\text{VC}_2$

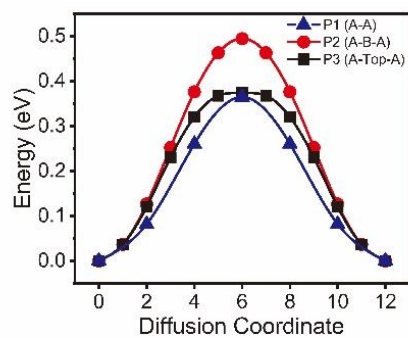

(h)  $\text{Mo}_2\text{VC}_2\text{H}_2$

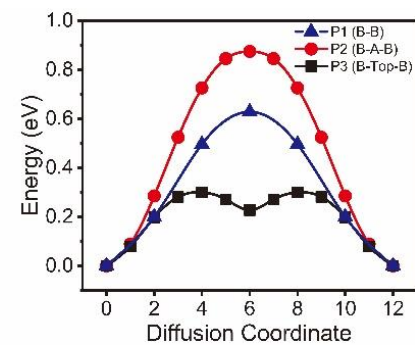

(i)  $\text{Mo}_2\text{VC}_2\text{O}_2$

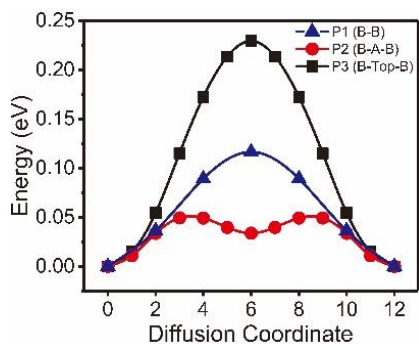

(j)  $\text{Mo}_2\text{ZrC}_2$

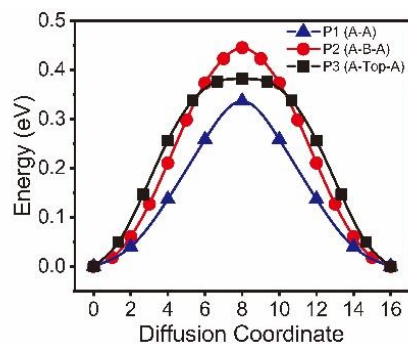

(k)  $\text{Mo}_2\text{ZrC}_2\text{H}_2$

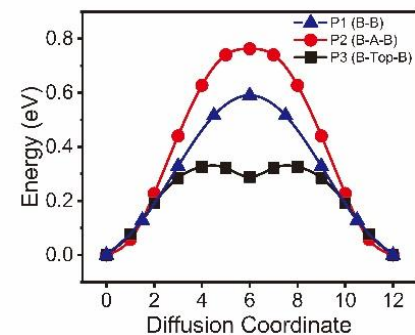

(l)  $\text{Mo}_2\text{ZrC}_2\text{O}_2$



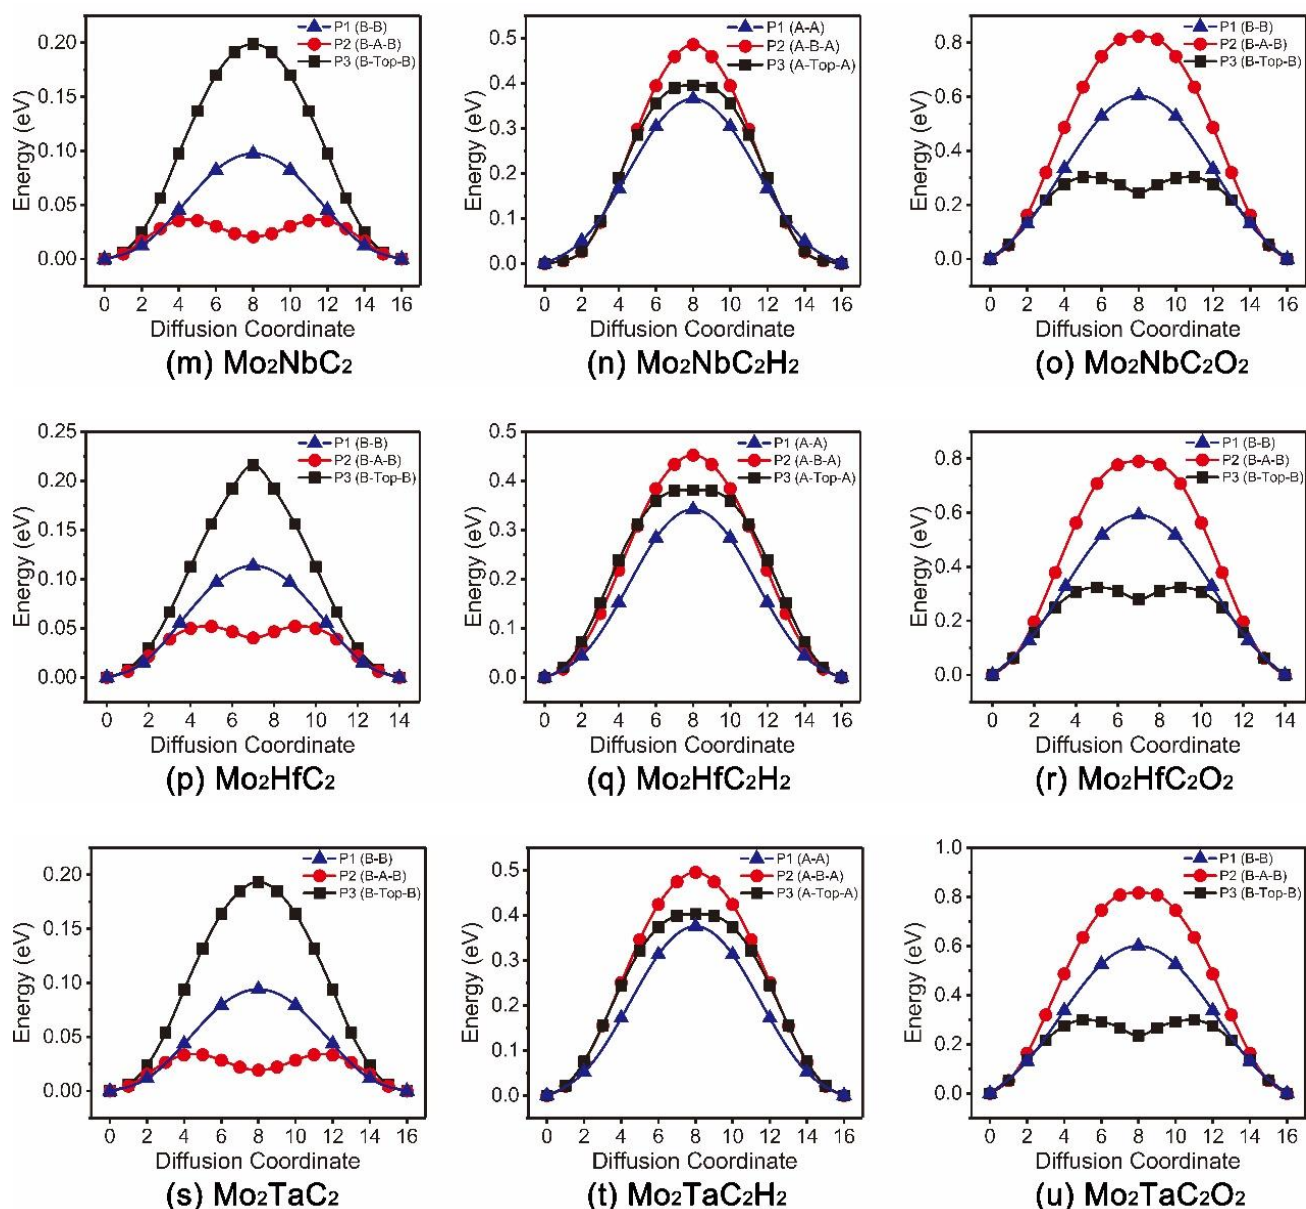

**Figure S7.** Diffusion energy profiles of Li-ion for  $\text{Mo}_2\text{MC}_2$  and  $\text{Mo}_2\text{MC}_2\text{T}_2$  ( $M = \text{Sc}, \text{Ti}, \text{V}, \text{Zr}, \text{Nb}, \text{Hf}, \text{Ta}$ , and  $T = \text{H}, \text{O}$ ) MXenes, calculated using a  $2 \times 2 \times 1$  supercell model.

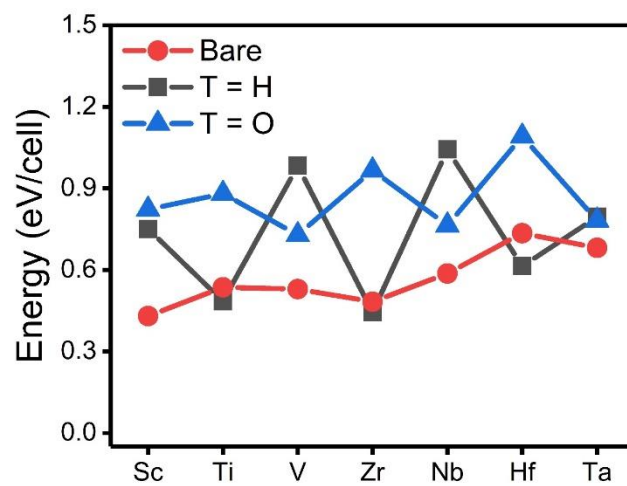

**Figure S8.** Formation energy of a Li vacancy in saturated adsorption structures  $(\text{Mo}_2\text{MC}_2)_4\text{Li}_8$  and  $(\text{Mo}_2\text{MC}_2\text{T}_2)_4\text{Li}_8$  ( $\text{T} = \text{H}, \text{O}$ ).

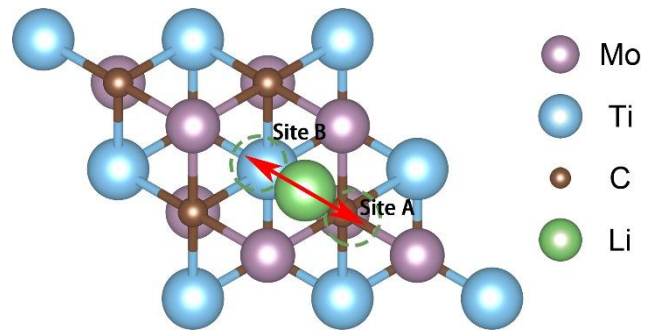

**Figure S9.** The phonon eigenvector of the soft mode at  $\Gamma$ -point for lithium atom at the saddle point. The direction of the vibration is the same as that of the diffusion.

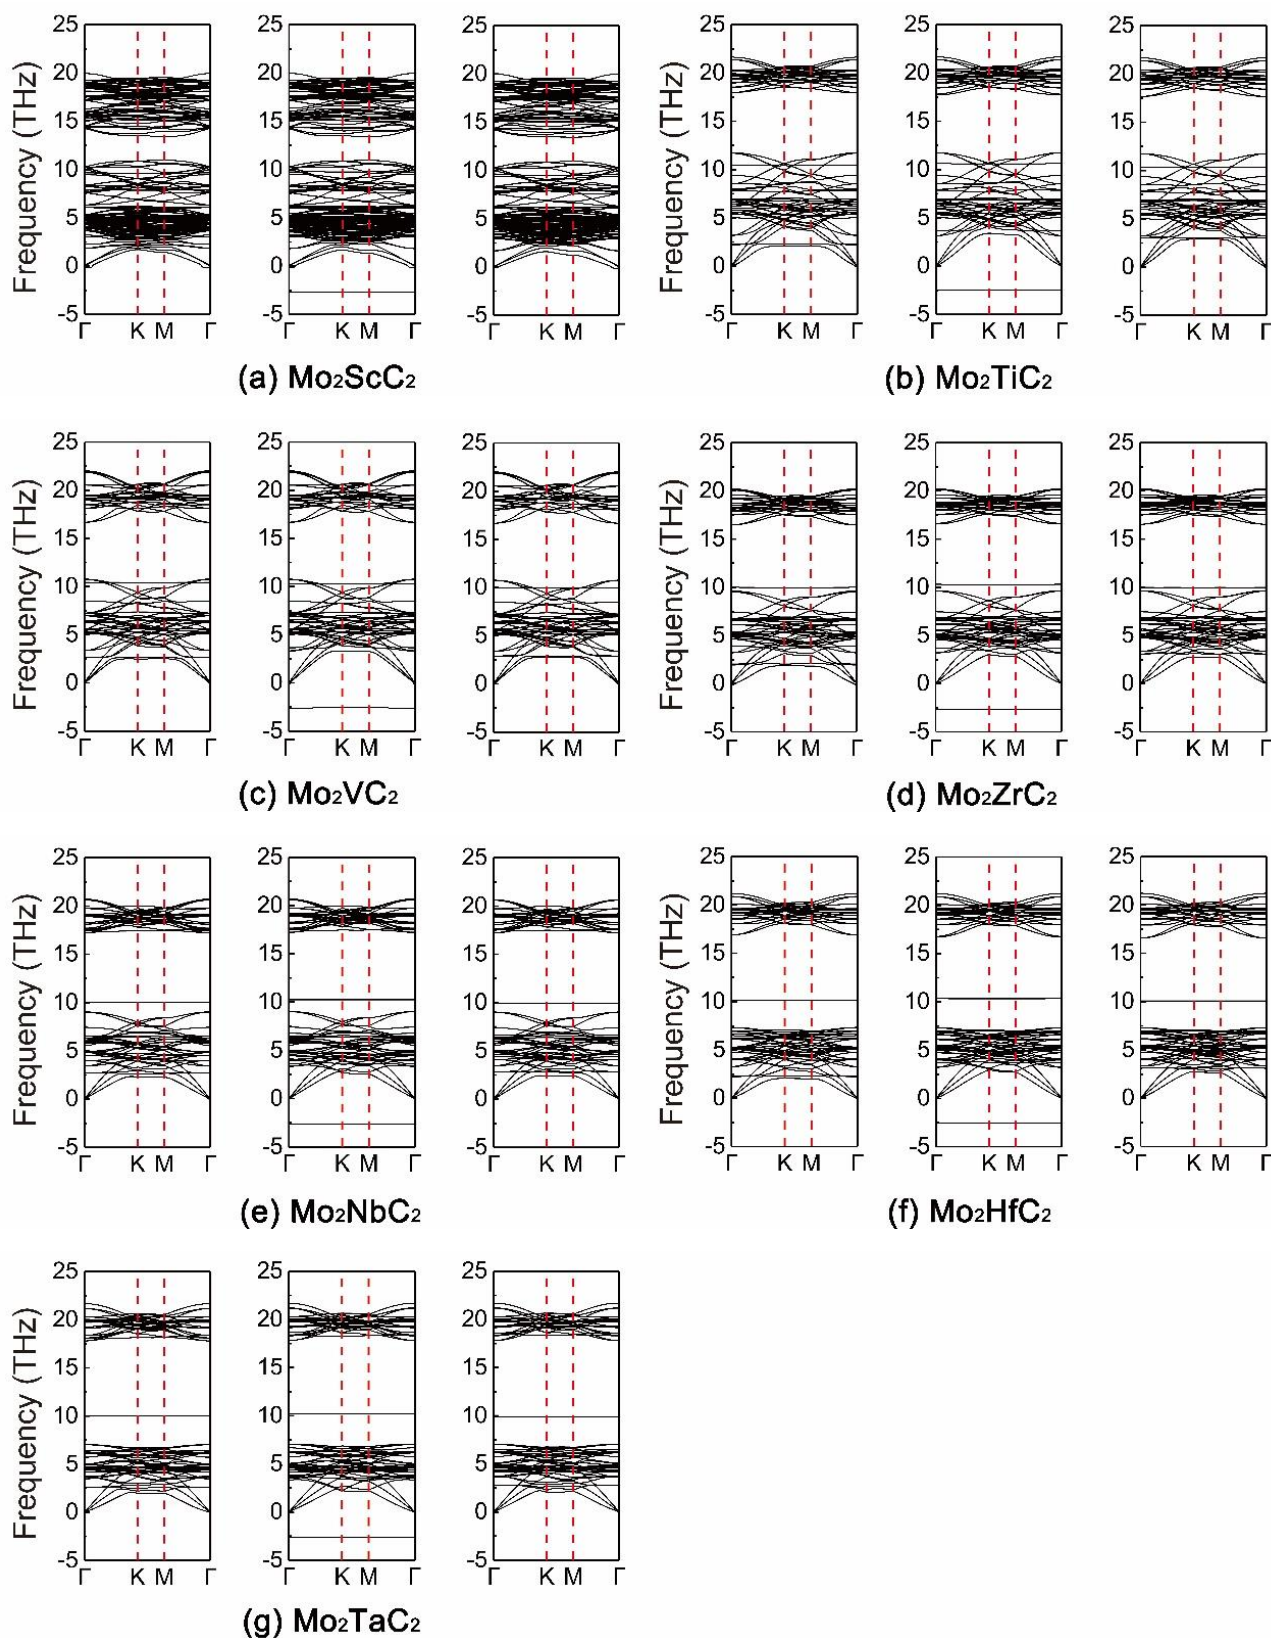

**Figure S10.** Calculated phonon band vibrational spectra of  $\text{Li}-(\text{Mo}_2\text{MC}_2)_4$  ( $M = \text{Sc}, \text{Ti}, \text{V}, \text{Zr}, \text{Nb}, \text{Hf}, \text{Ta}$ ) at the global energy minimum, the saddle-point, and metastable state on the diffusion pathways. Soft modes are displayed as the horizontal lines below 0 THz for all structure at saddle-point.

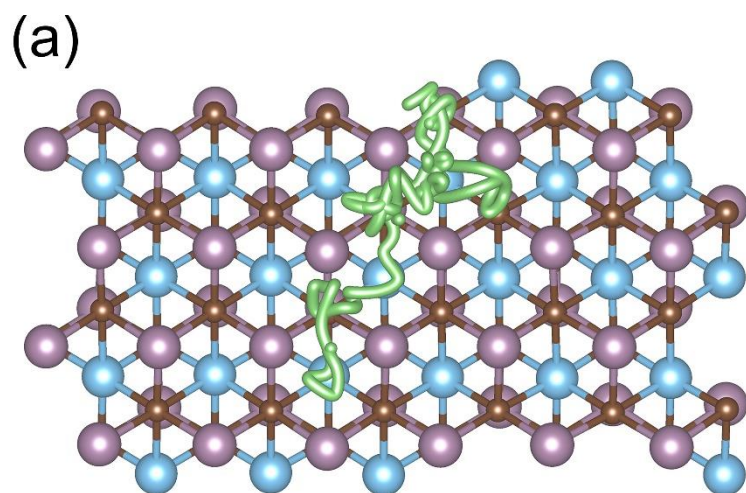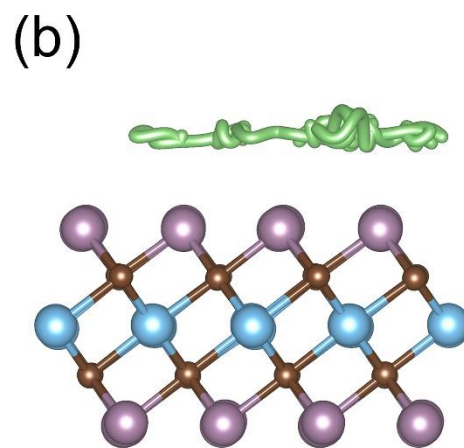

**Figure S11.** (a) Top view and (b) side view of the migration pathway of Li atom from FPMD simulation for Mo<sub>2</sub>TiC<sub>2</sub> monolayer at 400K.

**Table S1.** The adsorption energies  $E_{ab}$  of Li atoms on  $\text{Mo}_2\text{ScC}_2$  and  $\text{Mo}_2\text{ScC}_2\text{T}_2$  with spin-polarized and non-spin-polarized calculations.

|                                        | Adsorption energy (eV/cell) |                    |
|----------------------------------------|-----------------------------|--------------------|
|                                        | Spin-polarized              | Non-spin-polarized |
| $\text{Mo}_2\text{ScC}_2$              | -0.74                       | -0.74              |
| $\text{Mo}_2\text{ScC}_2\text{H}_2$    | -0.438                      | -0.440             |
| $\text{Mo}_2\text{ScC}_2\text{O}_2$    | -3.05                       | -3.05              |
| $\text{Mo}_2\text{ScC}_2\text{F}_2$    | -0.158                      | -0.159             |
| $\text{Mo}_2\text{ScC}_2(\text{OH})_2$ | 0.66                        | 0.66               |

**Table S2.** The bond lengths of Mo-C and C-M bonds for embedded MXene layers in between two overlayers after FPMD simulations ((Mo<sub>2</sub>MC<sub>2</sub>F<sub>2</sub>)<sub>12</sub>Li<sub>48</sub>).

|                                                 | $d_{\text{Mo-C}} (\text{\AA})$ | $d_{\text{C-M}} (\text{\AA})$ | $d_{\text{Mo-F}} (\text{\AA})$ |
|-------------------------------------------------|--------------------------------|-------------------------------|--------------------------------|
| Mo <sub>2</sub> ScC <sub>2</sub> F <sub>2</sub> | 2.15                           | 2.28                          | 3.63                           |
| Mo <sub>2</sub> TiC <sub>2</sub> F <sub>2</sub> | 2.13                           | 2.16                          | 3.72                           |
| Mo <sub>2</sub> VC <sub>2</sub> F <sub>2</sub>  | 2.09                           | 2.07                          | 3.86                           |
| Mo <sub>2</sub> ZrC <sub>2</sub> F <sub>2</sub> | 2.20                           | 2.38                          | -                              |
| Mo <sub>2</sub> NbC <sub>2</sub> F <sub>2</sub> | 2.09                           | 2.25                          | -                              |
| Mo <sub>2</sub> HfC <sub>2</sub> F <sub>2</sub> | 2.11                           | 2.25                          | -                              |
| Mo <sub>2</sub> TaC <sub>2</sub> F <sub>2</sub> | 2.10                           | 2.17                          | 3.37                           |

**Table S3.** The soft mode frequencies, diffusion barrier heights and corresponding diffusion coefficient obtained from TST+DFPT method, based on CI-NEB migration pathways for all intrinsic MXenes.

|                                  | Virtual frequency<br>(THz) | Barrier height<br>(eV) | Diffusion coefficient<br>(m <sup>2</sup> /s) |
|----------------------------------|----------------------------|------------------------|----------------------------------------------|
| Mo <sub>2</sub> ScC <sub>2</sub> | -2.678                     | 0.055                  | 2.54×10 <sup>-8</sup>                        |
| Mo <sub>2</sub> TiC <sub>2</sub> | -2.466                     | 0.043                  | 3.14×10 <sup>-8</sup>                        |
| Mo <sub>2</sub> VC <sub>2</sub>  | -2.582                     | 0.034                  | 4.25×10 <sup>-8</sup>                        |
| Mo <sub>2</sub> ZrC <sub>2</sub> | -2.639                     | 0.049                  | 2.46×10 <sup>-8</sup>                        |
| Mo <sub>2</sub> NbC <sub>2</sub> | -2.646                     | 0.036                  | 4.36×10 <sup>-8</sup>                        |
| Mo <sub>2</sub> HfC <sub>2</sub> | -2.508                     | 0.052                  | 2.60×10 <sup>-8</sup>                        |
| Mo <sub>2</sub> TaC <sub>2</sub> | -2.598                     | 0.033                  | 4.42×10 <sup>-8</sup>                        |



**Table S4.** Comparison of diffusion coefficients of Li atoms calculated for  $\text{Mo}_2\text{MC}_2$  (M = Sc, Ti, V) at 400K using TST+DFPT and FPMD simulations.

|              | Diffusion coefficient ( $\text{m}^2/\text{s}$ ) |                           |                          |
|--------------|-------------------------------------------------|---------------------------|--------------------------|
|              | $\text{Mo}_2\text{ScC}_2$                       | $\text{Mo}_2\text{TiC}_2$ | $\text{Mo}_2\text{VC}_2$ |
| TST analysis | $4.21 \times 10^{-8}$                           | $4.35 \times 10^{-8}$     | $5.70 \times 10^{-8}$    |
| FPMD         | $6.36 \times 10^{-9}$                           | $2.70 \times 10^{-9}$     | $9.77 \times 10^{-9}$    |
